# Supplementary material
Source: PubMed Central journal article supplement (PMC164677)

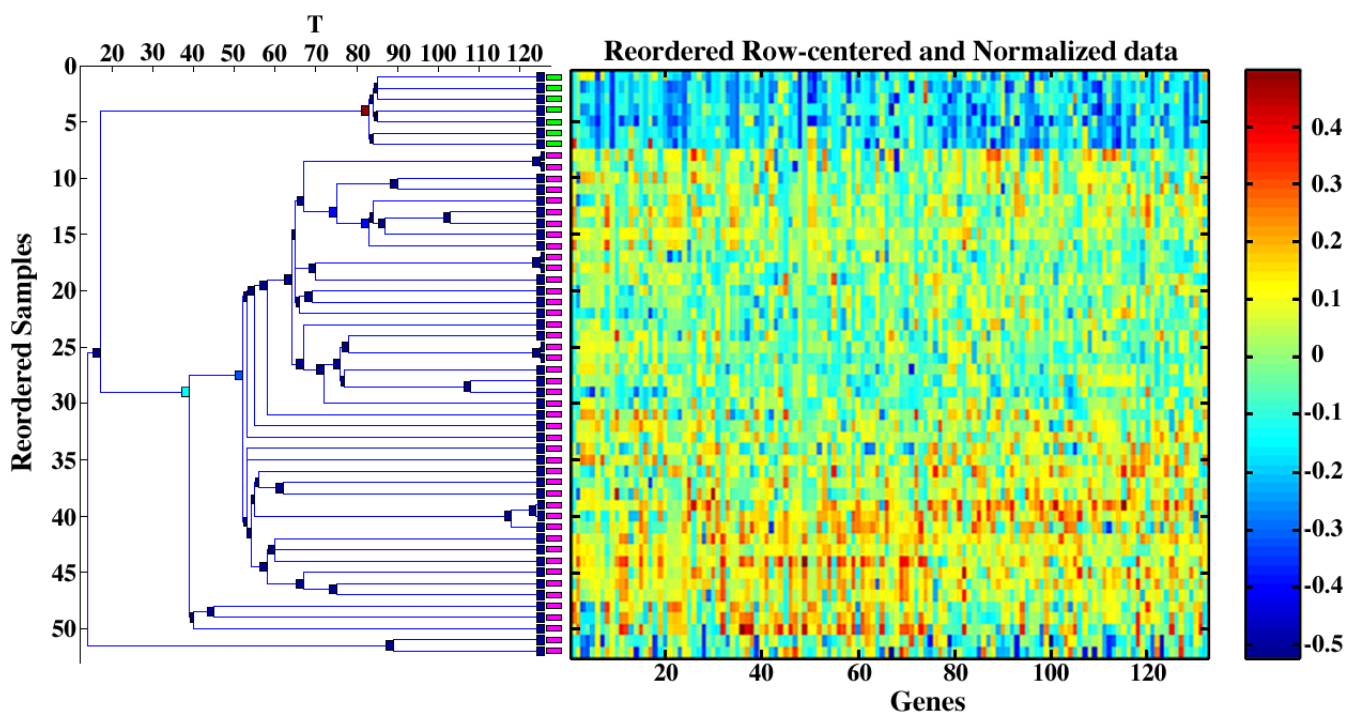

Supplement: pnas_1132115100_1.pdf [file pnas_1132115100_1.pdf]

### AMLs with ALL-1 rearrangement

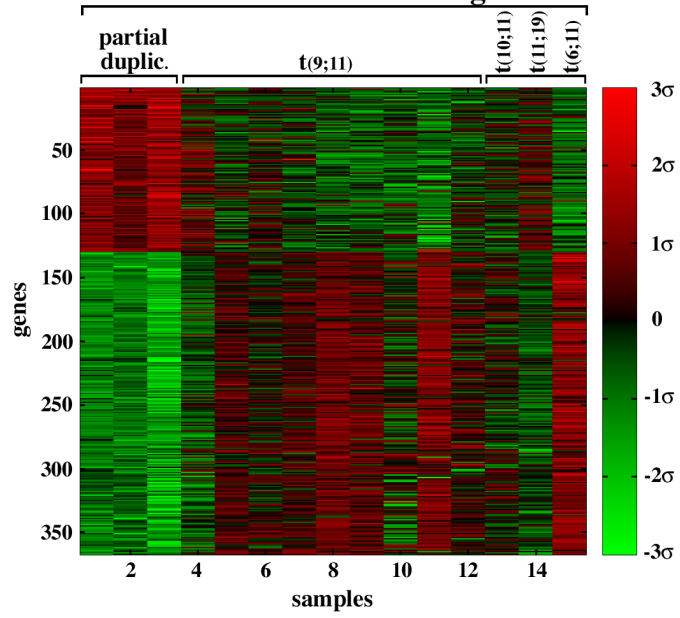

Supplement: pnas_1132115100_3.pdf [file pnas_1132115100_3.pdf]

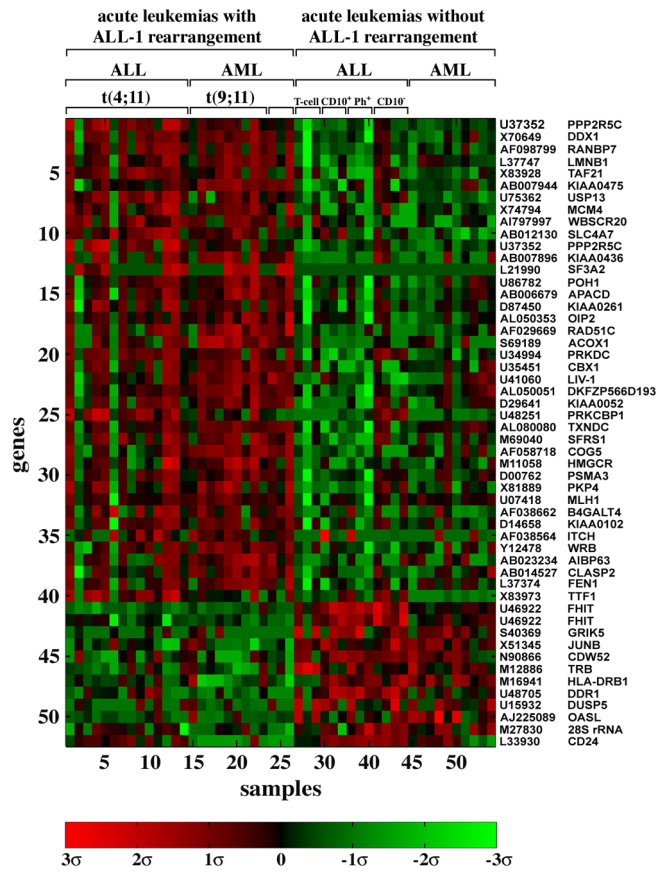

Supplement: pnas_1132115100_5.pdf [file pnas_1132115100_5.pdf]

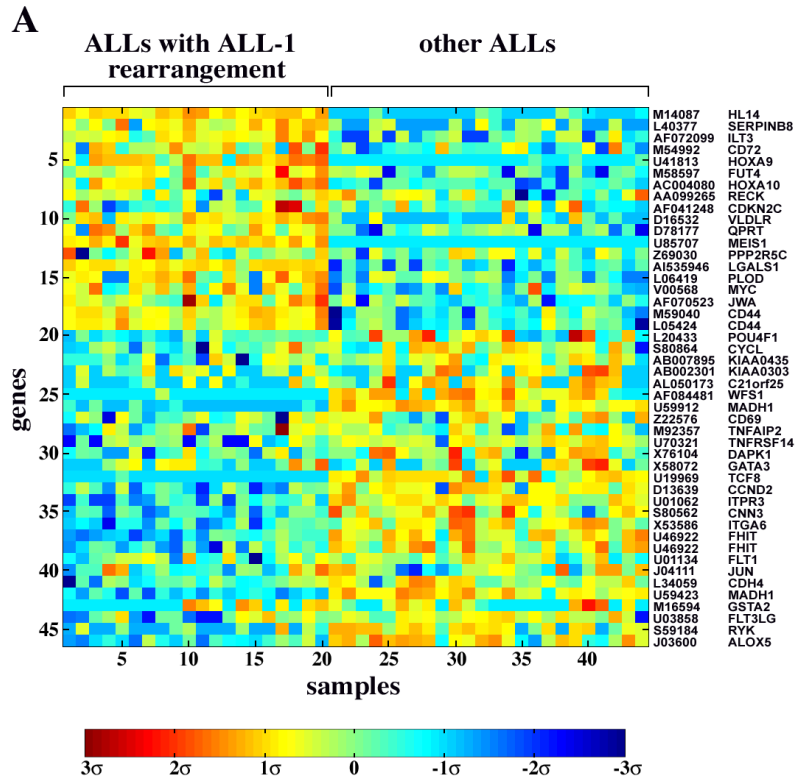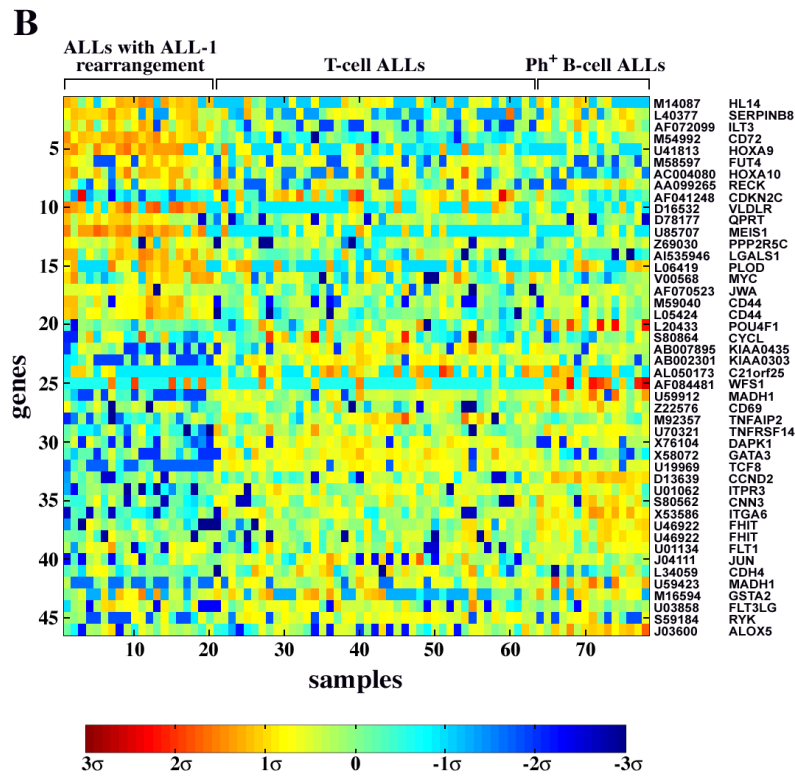

Supplement: pnas_1132115100_7.pdf [file pnas_1132115100_7.pdf]
